# Supplementary material for: Physiological responses of Skeletonema costatum to the interactionsof seawater acidification and combination of photoperiod and temperature
Source: Copernicus journal article supplement (doi:10.5194/bg-2020-303), 2020-08-24
Supplement: Supplementary file [file bg-2020-303-AC1-supplement.pdf]

1 **Reviewer 1**

2 Comments:

3 I am very happy to see a study of the interaction of increased pCO<sub>2</sub> with temperature  
4 and photoperiod on a model diatom. These multifactorial experiments are challenging  
5 but necessary. To limit the (infinite) range of possible combinations the authors  
6 matched photoperiod to expected seasonal temperature.

7 I think the data, as presented, is valuable, but under-analyzed. I offer some  
8 suggestions for some cross plots of physiological performance at growth condition  
9 with achieved growth rate. What is the growth return on O<sub>2</sub> evolution across the  
10 conditions?

11 **Response:** We thank the reviewer for the useful comments and suggestions that have  
12 greatly improved this manuscript.

13 The following figure is the relationship between net photosynthetic rates (pmol O<sub>2</sub>  
14 cell<sup>-1</sup> h<sup>-1</sup>) and specific growth rates (d<sup>-1</sup>) and we will add the figure and the  
15 relationships between other physiological parameters and growth in the revised MS.

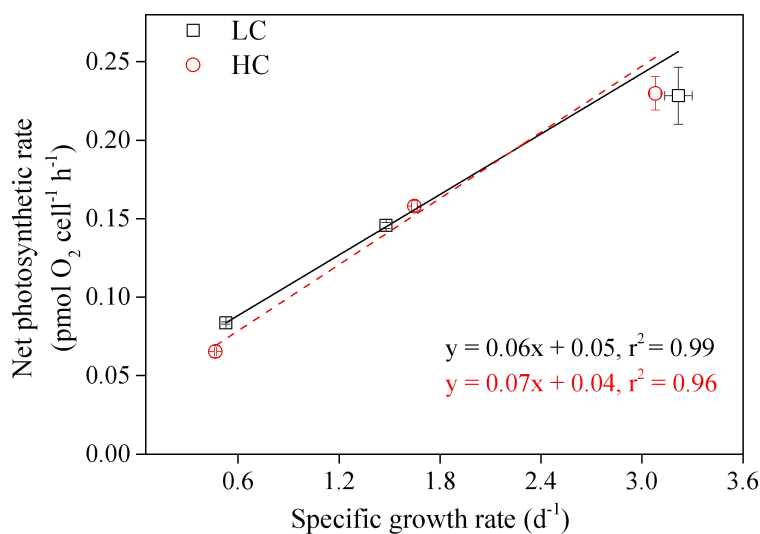

16

17 Abstract: Good

18 Materials and Methods:

19 2.3 The authors need to describe whether the growth rates taken every 2 days were  
20 averaged within each growth condition, or whether the maximum measured growth  
21 rate for a condition is taken. The presented growth rates are fast for a diatom.

22 **Response:** We are sorry for the ambiguous description. More details were added in  
23 the manuscript. Cultures were diluted every 3 days and cell concentration was counted  
24 two and three days after the dilution, and growth rates were calculated based on the  
25 concentrations. The data showed in Fig. 1 were averaged growth rates calculated for  
26 three times at different dilution days.

27 Diatoms have diverse cell sizes and thus growth rates of different species vary a lot.  
28 For *Skeletonema costatum*, the average growth rate is around 1.0-2.0 d<sup>-1</sup> under normal  
29 (20°C, 100 μmol photons m<sup>-2</sup> s<sup>-1</sup>, 12L: 12D) conditions (Balzano et al., 2011;  
30 Sakshaug and Andresen, 1986), which accords with the growth rates (1.6 d<sup>-1</sup>) under  
31 autumn condition (15°C, 150 μmol photons m<sup>-2</sup> s<sup>-1</sup>, 12L: 12D) in this study. In addition,  
32 the average growth rate could increase to 2.4 d<sup>-1</sup> under 12L: 12D light and dark cycle,  
33 when temperature rise to 25 °C (Zhang et al., 2020). In the present study, for the  
34 summer condition, daylength is 16 h, and temperature is 25 °C, which could lead to  
35 higher growth rate.

36 ' 2.7 Measurements of PSII Proteins' or '2.7 PSII Protein Measurements'

37 (current header is technically correct but is archaic usage).

38 **Response:** Corrected.

39 Figures/Results; Figure 1: Amazing growth rate under summer conditions; the fastest I  
40 have ever seen I think for a diatom.

41 **Response:** Please see our former responses (line 27-35).

42 Figure 2: Lovely data, congratulations. Very surprising switch of the OA effect in  
43 winter. Suggested additional plot: V at growth pCO<sub>2</sub>? After all, most of the curve as  
44 plotted is above even the OA range of pCO<sub>2</sub>. So a hypothetical V<sub>max</sub> may not be as  
45 important as the achieved V at growth conditions. Then, I would suggested plotting  
46 growth rate vs. V at growth condition (pCO<sub>2</sub> and light).

47 **Response:** We appreciate the reviewer for the useful suggestion. DIC concentrations  
48 in the culture media are about 2 and 2.1 mmol/L in ambient and OA environment  
49 respectively, and in the P-C curve, DIC concentration range from 0 to 4 mmol/L.  
50 Photosynthetic rate increased significantly with increasing DIC concentration when  
51 DIC is lower than 2 mmol/L, and the rate is relative constant when DIC is higher than  
52 2 mmol/L. In the present study V<sub>max</sub> obtained from the P-C curve showed similar  
53 pattern and value with V at growth condition. We will add this information in the  
54 results part.

55 Figure 4: Without standard curves, be very cautious in interpretation of the  
56 immunoblotting data. The example blot result shows near-saturation (non-linear  
57 response of signal to target abundance) for many of the bands. So the Y axis dynamic  
58 range of the greyscale plots may be considerably compressed relative to the actual  
59 change in protein target abundance. Once a band is black, it cannot get any blacker. It

60 is also very surprising that in winter OA increased RbcL signal.

61 **Response:** In this experiment we just calculated the relative value of each protein.

62 The data provide us with a general trend, not the accurate concentration as the  
63 reviewer mentioned, among different treatments. And we will add a caveat in the  
64 revised MS. Actin (internal control) could correct the experimental error in the  
65 process of quantitative sample loading of protein, to ensure the accuracy of the  
66 experimental results. The greyscale plots were measured according to density and the  
67 area of bands (TanonImage software). Although they are all black, the densities and  
68 areas are different in most conditions.

69 For the increased RbcL signal under OA condition in winter, although some  
70 researchers found RubisCO contents decreased at OA (Losh et al., 2013; Endo et al.,  
71 2015), RbcL expression of different diatoms (*Thalassiosira pseudonana*,  
72 *Phaeodactylum tricornutum*, and *T. weissflogii*) were found slightly increased under  
73 OA in nitrogen-replete condition (Hong et al., 2017). And phytoplankton communities  
74 showed enhanced Rubisco expression in 800 ppm treatment compared with 350 ppm  
75 (Tortell et al., 2000). A coastal isolated *T. pseudonana* and *Emiliana huxleyi* also  
76 showed higher RbcL contents in higher CO<sub>2</sub> level, although the offshore isolated *T.*  
77 *pseudonana* showed no significant difference between ambient and high CO<sub>2</sub>  
78 conditions (McCarthy et al., 2012). And low temperature could increase the relative  
79 amount of RbcL (Devos et al., 1998). We will add further discussion in the revised  
80 MS.

81 **References:**

82 Balzano S, Sarno D, Kooistra W H C F. Effects of salinity on the growth rate and  
83 morphology of ten *Skeletonema* strains. Journal of Plankton Research, 2011, 33:  
84 937-945.

85 Devos N, Ingouff M, Loppes R, et al. Rubisco adaptation to low temperatures: a  
86 comparative study in psychrophilic and mesophilic unicellular algae. Journal of  
87 Phycology, 1998, 34: 655-660.

88 Endo H, Sugie K, Yoshimura T, et al. Effects of CO<sub>2</sub> and iron availability on rbcL  
89 gene expression in Bering Sea diatoms. Biogeosciences, 2015, 12: 2247-2259.

90 Hong H, Li D, Lin W, et al. Nitrogen nutritional condition affects the response of  
91 energy metabolism in diatoms to elevated carbon dioxide. Marine Ecology Progress  
92 Series, 2017, 567: 41-56.

93 Losh J L, Young J N, Morel F M M. Rubisco is a small fraction of total protein in  
94 marine phytoplankton. New Phytologist, 2013, 198: 52-58.

95 McCarthy A, Rogers S P, Duffy S J, et al. Elevated carbon dioxide differentially alters  
96 the photophysiology of *thalassiosira pseudonana* (bacillariophyceae) and *emiliania*  
97 *huxleyi* (haptophyta) 1. Journal of Phycology, 2012, 48: 635-646.

98 Sakshaug E, Andresen K. Effect of light regime upon growth rate and chemical  
99 composition of a clone of *Skeletonema costatum* from the Trondheimsfjord,  
100 Norway. Journal of Plankton Research, 1986, 8: 619-637.

101 Tortell P D, Rau G H, Morel F M M. Inorganic carbon acquisition in coastal Pacific  
102 phytoplankton communities. Limnology and Oceanography, 2000, 45: 1485-1500.

103 Zhang L, Li H, Wu M, Li F, and Xu J.: Effects of seawater acidification on

104 photosynthetic physiological characteristics of *Skeletonema costatum* at different  
105 temperatures, Journal of Jiangsu Ocean University, 2020, 29: 1-7.

106 **Reviewer 2**

107 Comments:

108 The manuscript titled “Physiological responses of *Skeletonema costatum* to the  
109 interactions of seawater acidification and combination of photoperiod and  
110 temperature” described a research attempting to explore the impact of high pCO<sub>2</sub> (or  
111 ocean acidification, OA) under different seasons (combination of photoperiod and  
112 temperature) on the diatom *S. costatum*. The experiments are well conceived, and  
113 methods are clearly presented. The most interesting observation is that high pCO<sub>2</sub>  
114 (OA) does not uniformly impact *S. costatum* under different seasons: with somewhat  
115 negative impact on winter conditions. The authors showed the interesting observation,  
116 but the experimental design and data quality can be improved.

117 Here are some questions and suggestions for the authors.

118 **Response:** We thank the reviewer for the recognition of the value of our work and the  
119 valuable comments.

120 On the experimental setup, the authors stated that the cell culture pH did not change  
121 over 0.05 units in the 3d of one generation (section 2.3), so one very basic question is:  
122 what are the pH values and ranges for the six different conditions (i.e. three seasons  
123 and two pCO<sub>2</sub>)? Since the manuscript is about how OA impacts *S. costatum*  
124 differently during different seasons, the acidification information, which can be

125 presented easily as pH, is very critical to this whole article, however, this information  
126 is missing.

127 **Response:** The pH of culture media under different treatments are presented below.

128 And the information will be added in the revised MS.

| Treatments | W-LC        | W-HC        | A-LC        | A-HC        | S-LC        | S-HC        |
|------------|-------------|-------------|-------------|-------------|-------------|-------------|
| pH         | 8.10 ± 0.01 | 7.85 ± 0.01 | 8.14 ± 0.01 | 7.89 ± 0.01 | 8.19 ± 0.02 | 7.89 ± 0.02 |

129 Following the cell culture pH question, the authors measured the photosynthesis (P)  
130 vs DIC curve at pH 8.12 (section 2.5) and very likely they did the same with P-I curve.  
131 It would be better if the authors measure the responses under lower pH for high pCO<sub>2</sub>  
132 treated cells, according to the high pCO<sub>2</sub> (OA) conditions. It should be expected that  
133 the pH is lower under OA conditions, and *S. costatum* acclimated to OA conditions  
134 may not photosynthesize better under the experimental condition with higher pH  
135 (8.12). As a result, the presented P-I and P-DIC curves for *S. costatum* cultured in HC  
136 (OA conditions) may not reflect their real physiological status in terms of  
137 photosynthesis under OA conditions. Also please note that Tris buffer is known to  
138 change pH significantly with different temperature, so it is important to measure or  
139 calculate the pH at certain temperature.

140 **Response:** Researchers determine the P-C curves of OA treated cells under either  
141 ambient pH or culture pH (HC conditions). As the reviewer mentioned, P-C curves  
142 determined under culture pH could reflect the real physiological status under OA  
143 conditions. However, the percentages of DIC species (CO<sub>2</sub>, HCO<sub>3</sub><sup>-</sup>, CO<sub>3</sub><sup>2-</sup>) differ in  
144 media with different pH, which is inconvenient to compare K<sub>m</sub> of LC and HC cells.

145 Thus, some studies prefer setting same pH for LC and HC conditions to compare  $V_{\max}$   
146 and  $K_m$  at same pH (Nakajima et al., 2013; Shi et al., 2017). For P-I curves, the  
147 measurement time was much shorter than that used for P-C curves, so the pH  
148 wouldn't change markedly and Tris buffer was not used for P-I curves in the present  
149 study. Cells were resuspended in pre-aerated fresh medium under cultured condition  
150 (i.e. pH 8.14 for LC cells, 7.9 for HC cells) to measure P-I curves. Details for P-I  
151 measurements were added in the revised MS. We are sorry we missed the effects of  
152 Tris buffer on pH at different temperature. For the P-C curves measurements in the  
153 present study, Tris was added in the culture medium, and the pH of the medium used  
154 for resuspending cells was adjusted at room temperature.

155 In the results session, the authors only mentioned and cited Fig. 1, while Figure 2, 3, 4  
156 are listed at the end of the manuscript, none of those was referred in the text. In the  
157 tables presented, Table 2 and Table 3 do not show any units.

158 **Response:** We are sorry for the mistakes, Figure 2, 3, 4 are referred in the text now  
159 and units are added in Table 2 and 3 now.

160 In section 3.5 where the authors present the "PSII protein concentrations", RbcL was  
161 included as key PSII proteins. Such claim should be red-flagged, likewise the  
162 statement of "RbcL is related to the function of QA". Inclusion of RbcL in PSII  
163 proteins is also found in the Abstract and Discussion. The authors should make sure  
164 what RbcL really does with creditable citations before writing assumptions or  
165 conclusions about RbcL.



166 **Response:** We apologize for the vague statement regarding the RbcL. It's revised in  
167 section 3.5, Abstract and Discussion.

168 The description of methodology “Values of Actin were divided by other densitometric  
169 scanning values of protein to calculate Gray-scale values” should be modified to  
170 indicate the supposing meaning of normalizing density to Actin.

171 **Response:** Corrected. It has been revised as “Actin was used as internal control in  
172 order to correct the experimental error in the process of quantitative sample loading of  
173 protein, to ensure the accuracy of the experimental results.”

174 With the data presented in Figure 4, panel (a) and panel (b) do not seem to agree with  
175 each other. The western blot data does not look like a representative of the statistical  
176 data. For example, in W-HC (winter high pCO<sub>2</sub>) condition, the D1 density is much  
177 higher than Actin (Fig 4a), so such value is greater than 2 if analyzed using ImageJ,  
178 however, the data presented in statistics showed a value very tightly close to 0.9 (Fig  
179 4b). It would be nice if all raw data (immunoblots) are presented to support the  
180 statistics in Fig 4b.

181 **Response:** We thank the reviewer for pointing this out. We checked the data and  
182 revised the mistake. In Fig. 4 panel (a), the D1 value is 1.55 according to TanonImage  
183 software. The immunoblots data and revised Fig. 4 are presented as following:

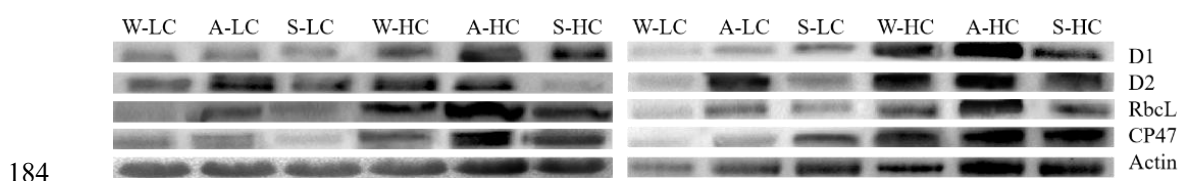

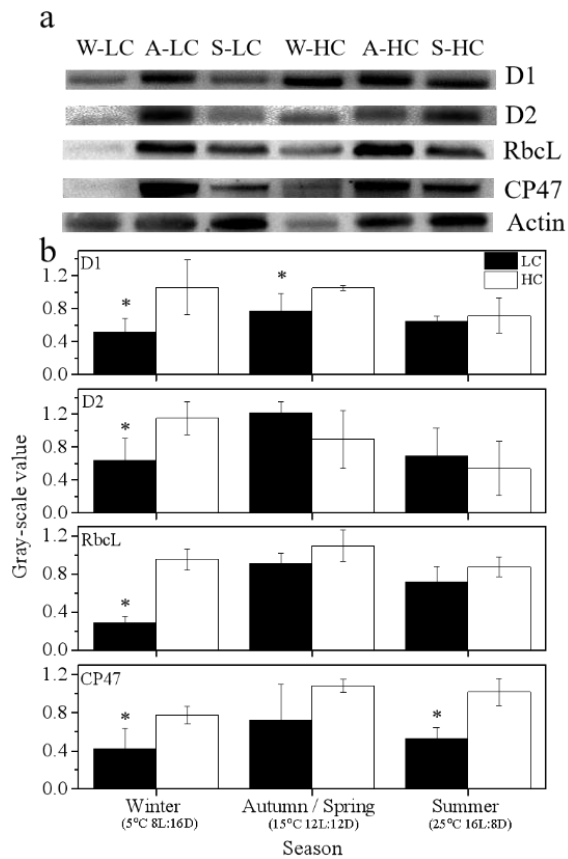

185

186 Other minor concerns:

187 Section 2.7, “1000 and 34.5 are constants”, what are the units? Or at least provide the  
 188 unit of “where C represents total chlorophyll concentration”.

189 **Response:** The unit of chlorophyll concentration is  $\mu\text{g} / \text{ml}$ . It is revised in the  
 190 manuscript.

191 The use of letter “C” is ambiguous in the text. C was also used as carbon in line 219:  
 192 “C fixation”.

193 **Response:** “C fixation” is revised as “carbon fixation”.

194 For the measurement of specific growth rate, more details on how data were collected  
 195 would be helpful. It would be better to have the raw data, cell concentration vs time

196 (days), presented.

197 **Response:** More details will be added in the revised MS. Cells concentration was  
 198 diluted every 3 days and cell concentration was counted two and three days after the  
 199 dilution, such growth rate data in Fig. 1 were calculated for three times at different  
 200 dilution days. The following figure presents cell concentrations and specific growth  
 201 rate at three different times.

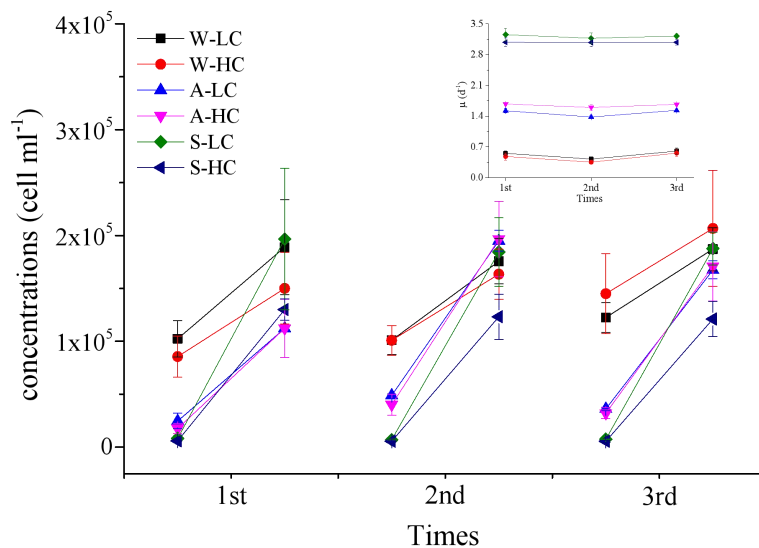

202

203 Line 229, “initial slop” should be “initial slope”.

204 **Response:** Corrected.

205 References

206 Shi Q, Xiahou W, Wu H. Photosynthetic responses of the marine diatom *Thalassiosira*  
 207 *pseudonana* to CO<sub>2</sub>-induced seawater acidification. *Hydrobiologia*, 2017, 788:  
 208 361-369.

209 Nakajima K, Tanaka A, Matsuda Y. SLC4 family transporters in a marine diatom  
 210 directly pump bicarbonate from seawater. *Proceedings of the National Academy of*  
 211 *Sciences*, 2013, 110: 1767-1772.

212
